# Supplementary material
Source: PubMed Central journal article supplement (PMC6215476)

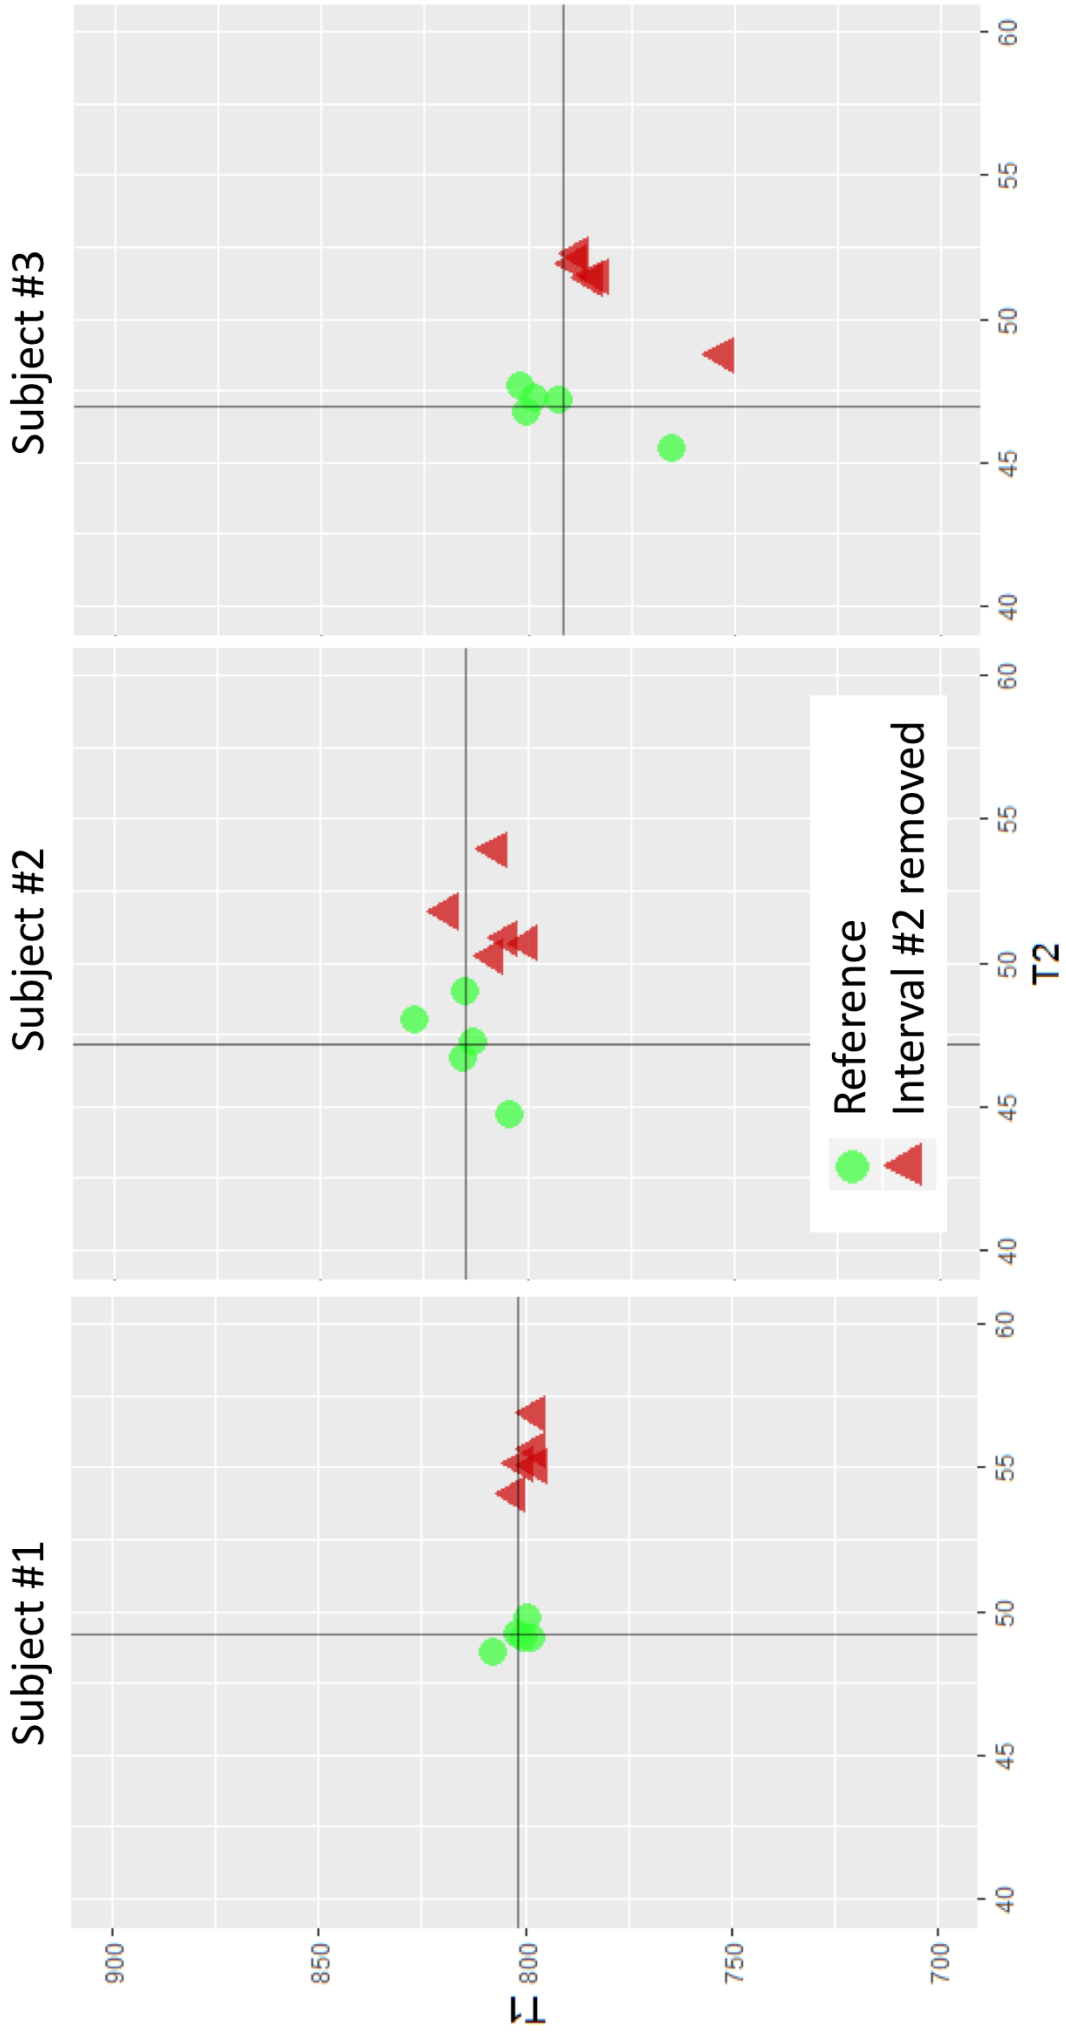

Supplement: NIHMS1506446-supplement-1.pdf [file NIHMS1506446-supplement-1.pdf]
